# Supplementary material
Source: Research Square preprint supplement (doi:10.21203/rs.3.rs-9738331/v1)
Supplement: Supplementary file 1 [file 4e98fdcec01db89e0e70ee96.docx]

**STROBE Checklist for Case-Control Studies**

**Manuscript title:** Microscopic-Endoscopic Combined Approach Versus Microscopic Surgery Alone for Cavernous Sinus Tumors: A Retrospective Case-Control Study

**Study design:** Retrospective case-control study

| **Item No.** | **Section** | **STROBE Recommendation** | **Reported on Page/Line** | **Manuscript Location / Comments** |
| --- | --- | --- | --- | --- |
| 1 | Title and abstract | Provide in the abstract an informative and balanced summary of what was done and what was found. | Page 1–4, lines 1–78 | The structured abstract includes OBJECTIVE, METHODS, RESULTS, and CONCLUSIONS. |
| 2 | Introduction: Background/rationale | Explain the scientific background and rationale for the investigation being reported. | Page 5-6, lines 79–125 | The Introduction describes the anatomical complexity of cavernous sinus tumors, limitations of microscopic surgery, and potential value of endoscopic assistance. |
| 3 | Introduction: Objectives | State specific objectives, including any prespecified hypotheses. | Page 7, lines 126–131 | The final paragraph of the Introduction states the aim of comparing MECA with MSA for cavernous sinus tumors. |
| 4 | Methods: Study design | Present key elements of study design early in the paper. | Page 7, lines 132–139 | The Methods section states that this was a retrospective single-center case-control study. |
| 5 | Methods: Setting | Describe the setting, locations, and relevant dates, including periods of recruitment, exposure, follow-up, and data collection. | Page 7, lines 140–146 | The Methods section describes the institutional setting, study period, surgical exposure groups, and follow-up. |
| 6(a) | Methods: Participants | Give the eligibility criteria, and the sources and methods of case ascertainment and control selection. Give the rationale for the choice of cases and controls. | Page 8-9, lines 147–179 | Patients with pathologically confirmed cavernous sinus tumors were included. MECA and MSA groups were defined according to surgical approach. |
| 6(b) | Methods: Participants | For matched studies, give matching criteria and the number of controls per case. | Page 9-10, lines 180–192 | A 1:1 propensity score matching was performed with a caliper width of 0.02. Matching covariates included age, sex, maximum tumor diameter, pathological type, and degree of internal carotid artery encasement. |
| 7 | Methods: Variables | Clearly define all outcomes, exposures, predictors, potential confounders, and effect modifiers. Give diagnostic criteria, if applicable. | Page 9-10, lines 180–192 | MECA, MSA, GTR, subtotal resection, partial resection, cranial nerve palsy, KPS, tumor progression/recurrence, PFS, and ICA encasement were defined. |
| 8 | Methods: Data sources/measurement | For each variable of interest, give sources of data and details of methods of assessment or measurement. Describe comparability of assessment methods if there is more than one group. | Page 9-10 lines 180–192 | Preoperative contrast-enhanced MRI was independently reviewed. Clinical and radiographic follow-up data were collected after surgery. |
| 9 | Methods: Bias | Describe any efforts to address potential sources of bias. | Page 9–10, lines 180–192 | Bias was reduced by independent imaging review, standardized outcome definitions, follow-up assessment, PSM, and multivariable regression. |
| 10 | Methods: Study size | Explain how the study size was arrived at. | Page 9-10, lines 180–192 | A total of 50 eligible patients were included, comprising 33 patients in the MECA group and 17 patients in the MSA group. |
| 11 | Methods: Quantitative variables | Explain how quantitative variables were handled in the analyses. If applicable, describe which groupings were chosen and why. | Page 9-10, lines 180–192 | Continuous variables were presented as mean±SD or median IQR, as appropriate. ICA encasement was categorized using >270° as a clinically relevant threshold. |
| 12(a) | Methods: Statistical methods | Describe all statistical methods, including those used to control for confounding. | Page 10, lines 193–203 | Statistical methods included t-test, Mann-Whitney U-test, chi-square test, Fisher exact test, 1:1 PSM, paired comparisons, multivariable logistic regression, Kaplan-Meier analysis, and log-rank test. |
| 12(b) | Methods: Statistical methods | Describe any methods used to examine subgroups and interactions. | Page 10, lines 193–203 | Subgroup analyses were performed according to pathological type, cavernous sinus compartment involvement, and selected surgical complexity factors. |
| 12(c) | Methods: Statistical methods | Explain how missing data were addressed. | Page 10, lines 249–255 | Patients with substantial missing clinical or imaging data were excluded. Missing-data handling was described in the Methods section. |
| 12(d) | Methods: Statistical methods | If applicable, explain how matching of cases and controls was addressed. | Page 10, lines 256–262 | After PSM, paired comparisons were performed using paired statistical methods as appropriate. |
| 12(e) | Methods: Statistical methods | Describe any sensitivity analyses. | Page 10, lines 193–203 | Both unmatched and propensity score-matched analyses were reported to evaluate the robustness of the findings. |
| 13(a) | Results: Participants | Report numbers of individuals at each stage of study, such as numbers potentially eligible, examined for eligibility, confirmed eligible, included in the study, completing follow-up, and analyzed. | Page 10, lines 204–213 | A total of 50 eligible patients were included: 33 underwent MECA and 17 underwent MSA. After PSM, 15 patients remained in each group. |
| 13(b) | Results: Participants | Give reasons for non-participation at each stage. | - | Reasons for exclusion or non-participation were reported in the patient selection process. |
| 13(c) | Results: Participants | Consider use of a flow diagram. | Figure 1 | A patient selection and group assignment flow diagram was provided. |
| 14(a) | Results: Descriptive data | Give characteristics of study participants and information on exposures and potential confounders. | Page 10, lines 204–213 | Baseline characteristics are reported in Table 1 before and after PSM. |
| 14(b) | Results: Descriptive data | Indicate number of participants with missing data for each variable of interest. | - | Missing data were reported or excluded according to predefined criteria. |
| 14(c) | Results: Descriptive data | Summarize follow-up time. | Page 12-13, lines 250-262 | Median follow-up was reported as 22 months in the MECA group and 24 months in the MSA group. Follow-up completion rates were 97.0% and 94.1%, respectively. |
| 15 | Results: Outcome data | Report numbers in each exposure category, or summary measures of exposure. | Page 10, lines 205–213 | Exposure groups were MECA n=33 and MSA n=17 before PSM, and 15 patients per group after PSM. |
| 16(a) | Results: Main results | Give unadjusted estimates and, if applicable, confounder-adjusted estimates and their precision. Make clear which confounders were adjusted for and why they were included. | Page 11, lines 214–224 | After PSM, the GTR rate was higher in the MECA group than in the MSA group. Multivariable regression was used to identify independent predictors of GTR. |
| 16(b) | Results: Main results | Report category boundaries when continuous variables were categorized. | Page 11, lines 214–224 | GTR was defined as resection of at least 95% of tumor volume on postoperative MRI. Subtotal resection was defined as 80%–94% resection, and partial resection as <80% resection. ICA encasement >270° was used as a categorical variable. |
| 16(c) | Results: Main results | If relevant, consider translating estimates of relative risk into absolute risk for a meaningful time period. | Page 12, lines 250–262 | Absolute event rates were reported, including GTR rate, cranial nerve morbidity, KPS, tumor progression/recurrence, and 3-year PFS. |
| 17 | Results: Other analyses | Report other analyses done, such as analyses of subgroups and interactions, and sensitivity analyses. | Page 11–12, lines 225–237 | Subgroup analyses suggested that MECA benefits were most relevant for tumors involving the posterosuperior quadrant or extending into sinonasal or other extracranial compartments. |
| 18 | Discussion: Key results | Summarize key results with reference to study objectives. | Page 13, lines 263–270 | The Discussion summarizes that MECA may improve extent of resection and reduce permanent cranial nerve morbidity compared with MSA in selected cavernous sinus tumors. |
| 19 | Discussion: Limitations | Discuss limitations of the study, taking into account sources of potential bias or imprecision. Discuss direction and magnitude of any potential bias. | Page 17, lines 365–373 | Limitations include retrospective single-center design, limited sample size, imbalance in group size, potential residual confounding, and selective use of methylene blue guidance. |
| 20 | Discussion: Interpretation | Give a cautious overall interpretation of results considering objectives, limitations, multiplicity of analyses, results from similar studies, and other relevant evidence. | Page 14, lines 292–304 | The interpretation is cautious, stating that MECA may be beneficial in selected cases rather than universally applicable to all cavernous sinus tumors. |
| 21 | Discussion: Generalisability | Discuss the generalisability of the study results. | Page 18, lines 374–380 | The findings may be most applicable to selected complex cavernous sinus tumors treated in experienced skull base surgery centers. |
| 22 | Other information: Funding | Give the source of funding and the role of the funders for the present study and, if applicable, for the original study on which the present article is based. | Page 2 , lines 23-24 | The funding statement should specify the funding source or state that no funding was received. |

**Abbreviations**

MECA = microscopic-endoscopic combined approach;
MSA = microscopic surgery alone;
GTR = gross-total resection;
PSM = propensity score matching;
ICA = internal carotid artery;
KPS = Karnofsky Performance Status;
PFS = progression-free survival;
MRI = magnetic resonance imaging
